# Supplementary material for: Engineering 3D-printed standalone conductive nerve guides using soft bioinks for peripheral nerve injuries
Source: Royal Society of Chemistry journal article supplement (doi:10.1039/d5ma00932d), 2025-11-12
Supplement: d5ma00932d1.pdf [file d5ma00932d1.pdf]

## Supporting Information

### Engineering 3D-printed standalone conductive nerve guides using soft bioinks for peripheral nerve injuries

Lin Li<sup>†</sup>, Angel Hernandez<sup>†, ‡</sup>, Ryan Grevsmuehl<sup>†, ‡</sup>, Yu-Ting Kou<sup>†</sup>, Shang Song<sup>†, ††, \*</sup>

<sup>†</sup> Department of Biomedical Engineering, College of Engineering, University of Arizona,

<sup>††</sup> Departments of Materials Science and Engineering, Neuroscience GIDP, and BIO5 Institute, University of Arizona, Tucson, Arizona, 85721, US

<sup>‡</sup> These authors contributed equally to the manuscript

\* Corresponding author; shangsong@arizona.edu

Tables

|                | 16% PVA                                                                           | 20% PVA                                                                           | 24% PVA                                                                            |
|----------------|-----------------------------------------------------------------------------------|-----------------------------------------------------------------------------------|------------------------------------------------------------------------------------|
| No PEDOT:PSS   |  |  |  |
| With PEDOT:PSS |  |  |  |

**Table S1.** Crosslinked conductive bioinks. Bioinks underwent gelation using a freeze-thaw cycle consisting of a twelve-hour freeze at  $-20^{\circ}\text{C}$  and a six-hour thaw at room temperature. The presence of PEDOT: PSS resulted in dark color while no gross change in morphology was detected for PVA at various concentrations.

|                                                   | Immediate after making solution<br>(t freeze = 0, thaw time = 0)                    | 1 hour freeze<br>1 hour thaw<br>2x                                                  | After freezing for 12 hours, 1 hour thaw<br>2x                                       | After freezing for 24 hours, 1 hour thaw<br>2x                                        |
|---------------------------------------------------|-------------------------------------------------------------------------------------|-------------------------------------------------------------------------------------|--------------------------------------------------------------------------------------|---------------------------------------------------------------------------------------|
| Dimensions:<br>4 mm in<br>6 mm out<br>5 mm height | 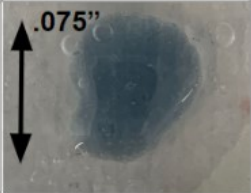 |  |  |  |

**Table S2.** The effect of freeze-thaw process on 3D-printed CNGs. A visual comparison highlighted the structural differences of bioinks at varying freeze-thawing periods. All bioinks consisting of 20% PVA with PEDOT: PSS experienced a fixed one-hour thawing time with variable freeze time from immediately after the solution was made (left: control) up to 24 hours of freezing (right).
